# Supplementary material
Source: Research Square preprint supplement (doi:10.21203/rs.3.rs-9555289/v1)
Supplement: Supplementary file 1 [file dac607b9b4dc5ebb5dff09c7.docx]

# Appendices

## Appendix 1 – Topic guide

## Appendix 2 - Field notes template

### **Clinical Vignette for Semi-Structured Interview**

Mrs Roberts, a 42 year old woman with ADPKD, presents for follow-up. Diagnosed incidentally at age 35, her family history includes her mother who was on dialysis by age 60. No other medical history other than well-controlled asthma.

Her recent bloods show a serum creatinine of 110 umol/l (eGFR 48). The most recent ultrasound showed “numerous cysts”, the largest being 5cm on the left kidney. Her kidney volume on an MRI 12 months ago was 920ml. She’s asymptomatic other than occasional bilateral flank pain. No recent history of haematuria, UTIs or cyst rupture.

Mrs Roberts’ is concerned about disease progression and inquiries about interventions, particularly tolvaptan. But worries about its side effects affecting her quality of life and job.

## Appendix 3 - Field notes template

## Appendix 4 – Prescribing pathways at cases

# Supplementary Materials

## Supplementary Material 1 – Consolidated criteria for reporting qualitative studies (COREQ): 32-item checklist

| **Item No** | | **Guide Questions/Description** | **Reported on Page #** |
| --- | --- | --- | --- |
| **Domain 1: Research team and reflexivity** | | | |
| **Personal Characteristics** | | | |
| 1. Interviewer/ facilitator | | Which author/s conducted the interview or focus group? | 4 |
| 2. Credentials | | What were the researcher’s credentials? E.g., PhD, MD | 3 |
| 3. Occupation | | What was their occupation at the time of the study? | 3 |
| 4. Gender | | Was the researcher male or female? | 3 |
| 5. Experience and training | | What experience or training did the researcher have? | 3 |
| **Relationship with participants** | | | |
| 6. Relationship established | | Was a relationship established prior to study commencement? | 4 |
| 7. Participant knowledge of the interviewer | | What did the participants know about the researcher? e.g. personal goals, reasons for doing the research? | 4 |
| 8. Interviewer characteristics | | What characteristics were reported about the interviewer/facilitator? e.g. Bias, assumptions, reasons and interests in the research topic | 3 |
| **Domain 2: study design** | | |
| **Theoretical framework** | | |
| 9. Methodological orientation and Theory | What methodological orientation was stated to underpin the study? e.g. grounded theory, discourse analysis, ethnography, phenomenology, content analysis | 5 |
| **Participant selection** | | |
| 10. Sampling | How were participants selected? e.g., purposive, convenience, consecutive, snowball | 4 |
| 11. Method of approach | How were participants approached? e.g., face-to-face, telephone, mail, email | 4 |
| 12. Sample size | How many participants were in the study? | 6 |
| 13. Non-participation Setting | How many people refused to participate or dropped out? Reasons? | 6 |
| 14. Setting of data collection | Where was the data collected? e.g., home, clinic, workplace | 4-5 |
| 15.Presence of non-participants | Was anyone else present besides the participants and researchers? | 4 |
| 16. Description of sample | What are the important characteristics of the sample? e.g. demographic data, date | 6 |
| **Data collection** | | |  | No |
| 17. Interview guide | Were questions, prompts, and guides provided by the authors? Was it pilot tested? | Appendix 1, 4 |
| 18. Repeat interviews | Were repeat interviews carried out? If yes, how many? | NA |
| 19. Audio/visual recording | Did the research use audio or visual recording to collect the data? | 4 |
| 20. Field notes | Were field notes made during and/or after the interview or focus group? | 4-5 |
| 21. Duration | What was the duration of the interviews or focus group? | 4-5 |
| 22. Data saturation | Was data saturation discussed? | 5 |
| 23. Transcripts returned | Were transcripts returned to participants for comment and/or correction? – No | NA |
| **Domain 3: analysis and findings** | | |
| **Data analysis** | | |
| 24. Number of data coders | How many data coders coded the data? | 5 |
| 25. Description of the coding tree | Did the authors provide a description of the coding tree? | 5 |
| 26. Derivation of themes | Were themes identified in advance or derived from the data? | 5 |
| 27. Software | What software, if applicable, was used to manage the data? | 5 |
| 28. Participant checking | Did participants provide feedback on the findings? | NA |
| **Reporting** | | |
| 29. Quotations presented | Were participant quotations presented to illustrate the themes/findings? Was each quotation identified? e.g., participant number | 13-20 |
| 30. Data and findings consistent | Was there consistency between the data presented and the findings? | 13-20 |
| 31. Clarity of major themes | Were major themes clearly presented in the findings? | 13-20 |
| 32. Clarity of minor themes | Is there a description of diverse cases or a discussion of minor themes? | 13-20 |
